# Supplementary material for: Spatiotemporal variability in surface energy balance across tundra, snow and ice in Greenland
Source: Springer Nature journal article supplement (doi:10.1007/s13280-016-0867-5), 2017-01-23
Supplement: MOESM1 [file 15654742]

**Ambio**

Electronic Supplementary Materials

*This supplementary material has not been peer reviewed.*

Title: **Spatiotemporal variability in surface energy balance across tundra and ice in Greenland**

Authors: Magnus Lund, Christian Stiegler, Jakob Abermann, Michele Citterio, Birger U. Hansen, Dirk van As

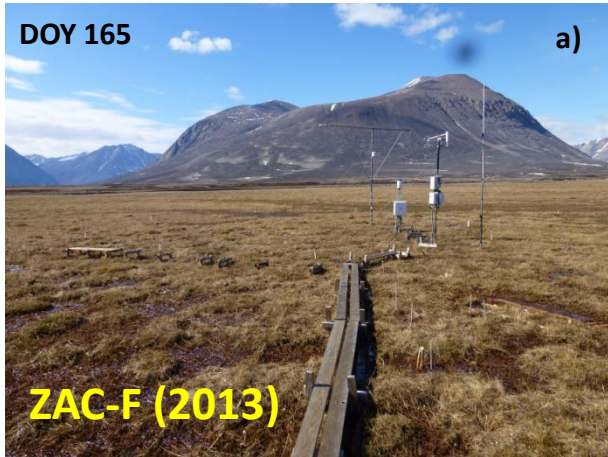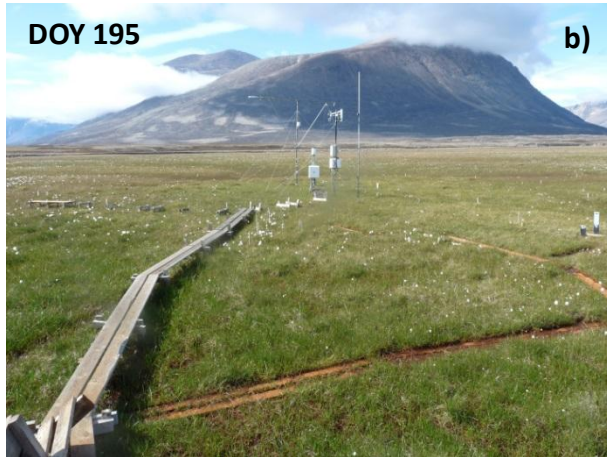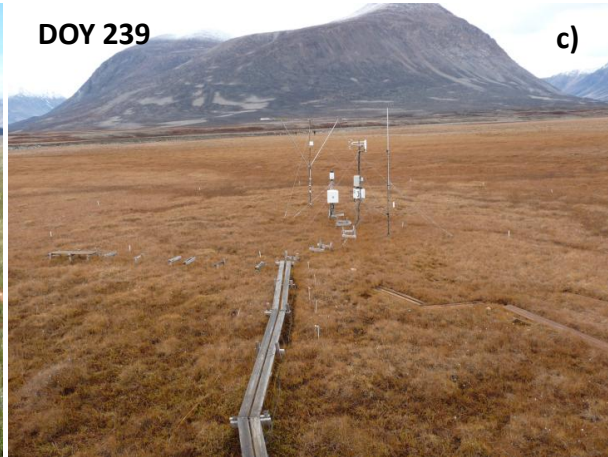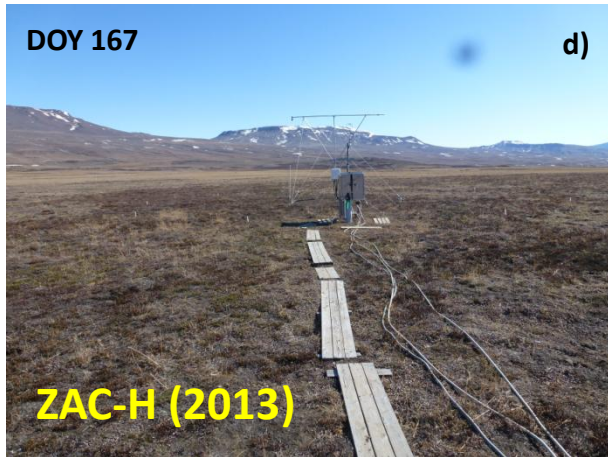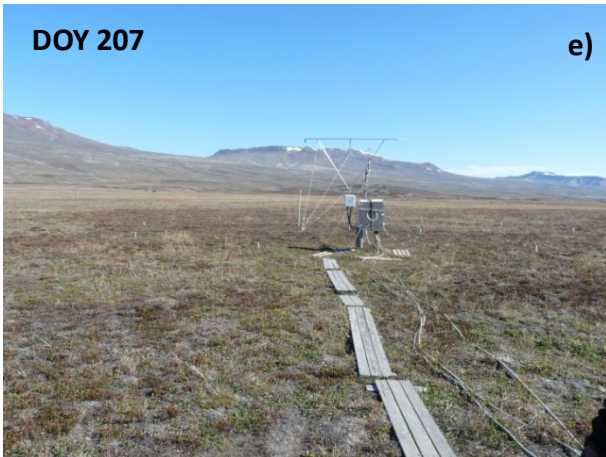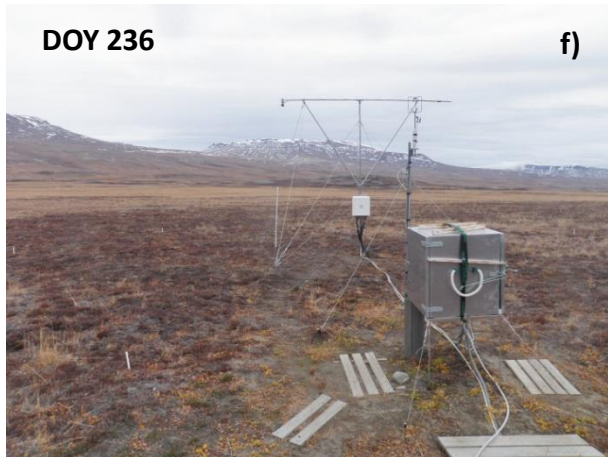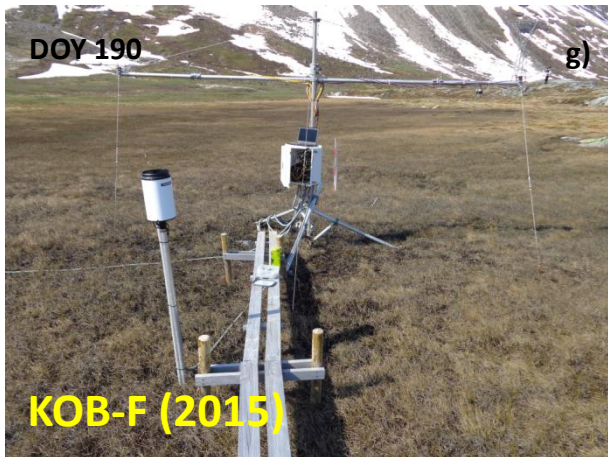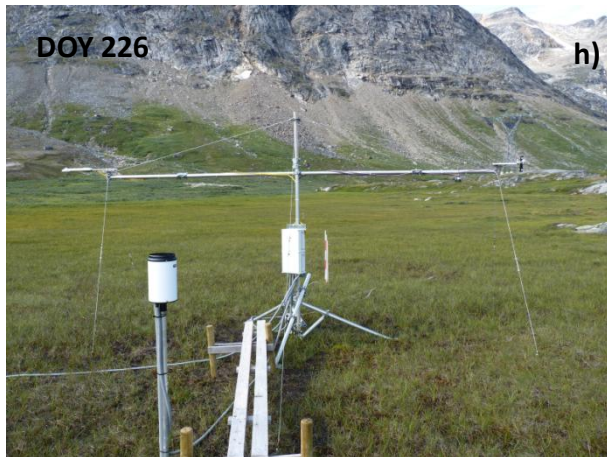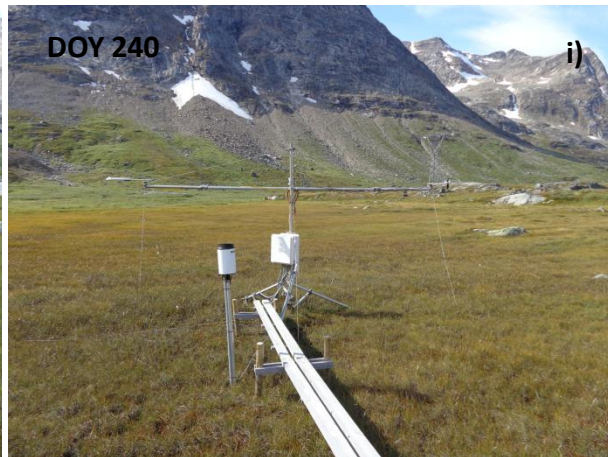



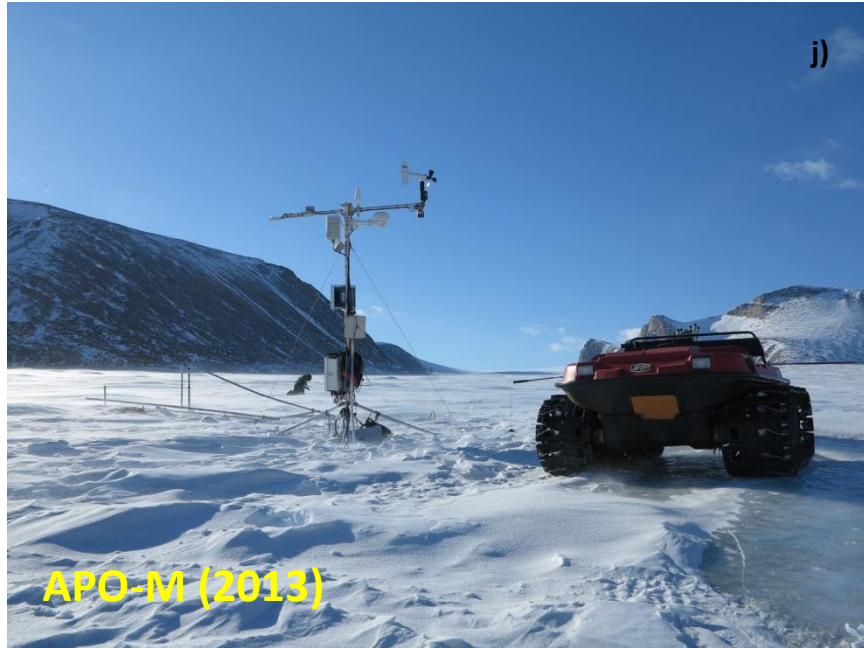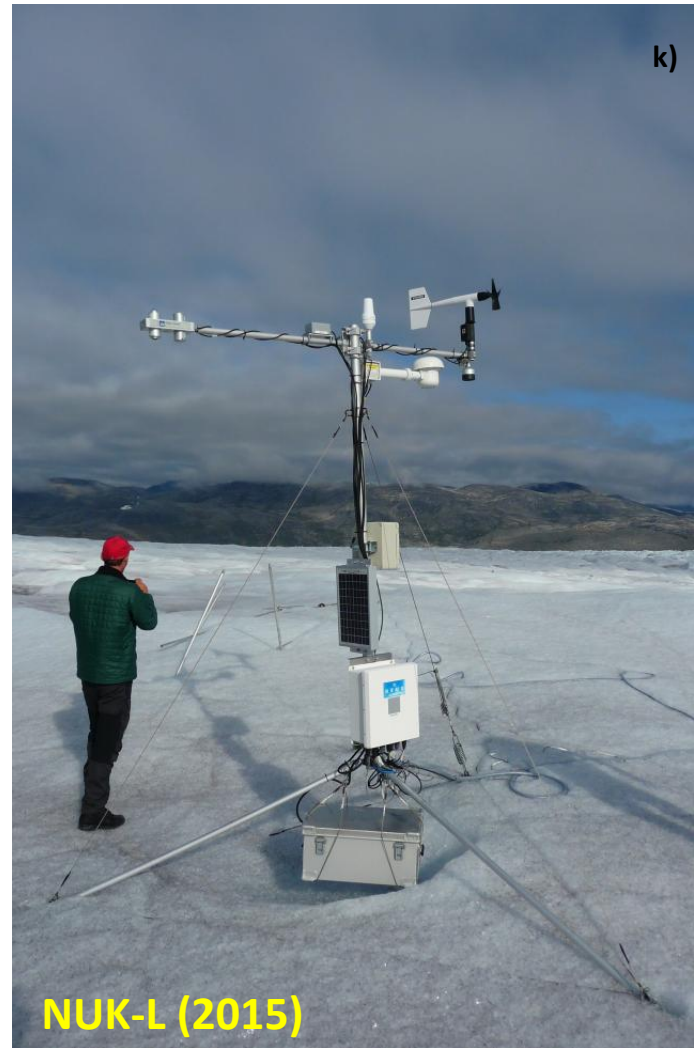

Fig. S1. Photos from each site, a-c) ZAC-F, d-f) ZAC-H, g-i) KOB-F, j) APO-M, k) NUK-L
